# Supplementary material
Source: PubMed Central journal article supplement (PMC10659100)
Supplement: NIHMS1921767-supplement-1.pdf [file NIHMS1921767-supplement-1.pdf]

## Supplemental Tables:

Supplemental Table 1. Properties of the FSHR ligands used.

| Property of FSHR agonist     | rh-follitropin- $\alpha$ | TOP5300 | rh-follitropin- $\alpha$ /TOP5300 |
|------------------------------|--------------------------|---------|-----------------------------------|
| <b>Molecular weight</b>      | 24,000                   | 580     | 41.4                              |
| <b>Glycosylation termini</b> | Sialic acid              | None    | -                                 |
| <b>Half-life in rodent</b>   | 2-6 hr                   | 5.5 hr  | 0.8                               |
| <b>CHO-FSHR EC50</b>         | 12 pM                    | 9 nM    | 0.001                             |

Supplemental Table 2. Patient characteristics.

| Category                            | Normal Ovarian Reserve | Polycystic Ovarian Syndrome | Advanced Reproductive Age |
|-------------------------------------|------------------------|-----------------------------|---------------------------|
| <b>Age</b>                          | 31.12                  | 32.42                       | 37.88                     |
| <b>Anti-Mullerian Hormone</b>       | 4.31                   | 6.97                        | 2.61*                     |
| <b>Antral follicle count (AFC)</b>  | 18.13                  | 24.5                        | 12.47*                    |
| <b>Follicular fluid volume (mL)</b> | 69.38                  | 121.58*                     | 73.25                     |
| <b>Number of oocytes retrieved</b>  | 15.38                  | 29.08                       | 13.88                     |
| <b>n</b>                            | 8                      | 12                          | 17                        |

\*p <0.05, paired t-test

Note: The 4 additional patients not listed in this table fell under the "other" category that included more than one diagnosis such as PCOS and ARA.

Supplemental Table 3. Cycle characteristics.

| Patient | Diagnosis | Age | AMH   | AFC           | Cycle Type        | rh-FSH (IU) | urinary FSH | Menopur (IU Menotropin) | GnRH Antag | Estrace Prim | Lupron micrc | Omnitrope | Other | Trigger Shot      | Fluid Vol (ml)    | Number of C | Pregnant |   |
|---------|-----------|-----|-------|---------------|-------------------|-------------|-------------|-------------------------|------------|--------------|--------------|-----------|-------|-------------------|-------------------|-------------|----------|---|
| 1       | NOR       | 29  | 5.73  | 11            | GnRH Antag        |             | 1,350       |                         | 1,350      | 1,250        |              |           |       | Lupron + 3300 hCG | 60                | 11          | Y        |   |
| 2       | NOR       | 31  | 5.89  | 12+           | GnRH Antag        | 2,625       |             | 1,350                   |            | 1,000        |              |           |       | Lupron + 3300 hCG | 30                | 6           | Y        |   |
| 3       | NOR       | 32  | 3.23  | 16            | GnRH Antag        |             | 4,125       |                         | 2,475      | 1,000        |              |           |       | 10k hCG           | 100               | 14          | -        |   |
| 4       | NOR       | 32  | 2.28  | 23            | GnRH Antag        | 2,175       |             | 1,200                   |            | 1,250        |              |           |       | Lupron + 3300 hCG | 35                | 10          | N        |   |
| 5       | NOR       | 33  | 4.36  | 19            | GnRH Antag        | 2,925       |             | 1,425                   |            | 1,500        |              |           |       | Lupron + 3300 hCG | 110               | 27          | -        |   |
| 6       | NOR       | 33  | 6.8   | 22            | GnRH Antag        | 2,250       |             | 750                     |            | 1,250        |              |           |       | Double Lupron     | 80                | 25          | -        |   |
| 7       | NOR       | 34  | 2.4   | 16+           | GnRH Antag        |             | 2,475       |                         | 1,650      | 2,000        |              |           |       | Lupron + 3300 hCG | 50                | 14          | Y        |   |
| 8       | NOR       | 25  | 3.77  | 26            | GnRH Antag        | 1,875       |             | 1,650                   |            | 1,500        |              |           |       | Lupron + 3300 hCG | 90                | 16          | -        |   |
| 9       | ARA       | 39  | 1.53  | 1             | GnRH Antag        | 5,475       |             | 1,950                   |            | 1,250        |              |           | X     | Low dose hCG      | Double Lupron     | 125         | 16       | Y |
| 10      | ARA       | 35  | 1.008 | 7             | GnRH Antag        |             | 2,400       |                         | 2,400      | 1,000        |              |           |       | 10k hCG           | 50                | 8           | -        |   |
| 11      | ARA       | 39  | 4.9   | 20            | GnRH Antag        |             | 4,410       |                         | 1,575      | 1,250        |              |           |       | Lupron + 3300 hCG | 80                | 9           | N        |   |
| 12      | ARA       | 36  | 7.138 | 18            | GnRH Antag        |             | 1,500       |                         | 675        | 750          |              |           |       | Double Lupron     | 170               | 26          | Y        |   |
| 13      | ARA       | 35  | 1.75  | 9             | Lupron Micrc      | 3,000       |             | 3,000                   |            |              |              | X         | X     | 10k hCG           | 65                | 14          | Y        |   |
| 14      | ARA       | 40  | 0.68  | 13            | GnRH Antag        |             | 4,500       |                         | 1,500      | 1,000        | X            |           |       | Clomid            | 10k hCG           | 22          | 3        | - |
| 15      | ARA       | 39  | 1.7   | 5             | GnRH Antag        |             | 5,850       |                         | 1,950      | 1,250        | X            |           | X     | 10k hCG           | 90                | 14          | Y        |   |
| 16      | ARA       | 41  | 2.9   | 16+           | GnRH Antag        |             | 1,800       |                         | 1,800      | 1,000        |              |           |       | Lupron + 3300 hCG |                   | 12          | Y        |   |
| 17      | ARA       | 36  | 1.18  | 15            | GnRH Antag        | 3,150       |             | 2,025                   |            | 750          |              |           |       | 10k hCG           | 80                | 10          | Y        |   |
| 18      | ARA       | 38  | 2.48  | 13            | GnRH Antag        | 4,275       |             | 2,700                   |            | 1,250        |              |           | X     | 10k hCG           | 64                | 22          | Y        |   |
| 19      | ARA       | 40  | 1.47  | 15            | GnRH Antag        |             | 5,400       |                         | 2,550      | 1,250        | X            |           | X     | 10k hCG           | 35                | 6           | -        |   |
| 20      | ARA       | 38  | 4.37  | 22            | GnRH Antag        | 2,700       |             | 1,350                   |            | 1,250        |              |           |       | Lupron + 3300 hCG | 70                | 17          | Y        |   |
| 21      | ARA       | 37  | 1.6   | 6             | Lupron Micrc      | 1,800       |             | 600                     |            |              | X            | X         |       | 10k hCG           | 40                | 9           | -        |   |
| 22      | ARA       | 44  | 1.26  | 5             | GnRH Antag        | 2,700       |             | 1,350                   |            | 1,000        |              |           |       | Lupron + 5k hCG   | 60                | 11          | -        |   |
| 23      | ARA       | 37  | 4.46  | 14            | GnRH Antag        | 3,525       |             | 1,500                   |            | 1,000        |              |           |       | Lupron + 3000 hCG | 72                | 20          | Y        |   |
| 24      | ARA       | 35  | 1.3   | 16            | GnRH Antag        | 2,400       |             | 1,200                   |            | 1,000        |              |           |       | Lupron + 3000 hCG | 78                | 15          | -        |   |
| 25      | ARA       | 35  | 4.57  | 17            | GnRH Antag        | 3,825       |             | 1,650                   |            | 1,250        |              |           |       | Lupron + 3000 hCG | 71                | 24          | -        |   |
| 26      | PCOS      | 32  | 4.06  | 33            | GnRH Antag        | 3,075       |             | 2,100                   |            | 1,500        |              | X         |       | Lupron + 3300 hCG | 150               | 34          | -        |   |
| 27      | PCOS      | 34  | 4.15  | 21            | GnRH Antag        | 1,200       |             | 975                     |            | 1,000        |              |           |       | Lupron            | 132               | 23          | -        |   |
| 28      | PCOS      | 32  | 6     | 20+           | GnRH Antag        |             | 1,500       |                         | 825        | 1,000        |              |           |       | Lupron            | 92                | 36          | Y        |   |
| 29      | PCOS      | 31  | 8.08  | 20+           | GnRH Antag        | 1,425       |             | 1,275                   |            | 750          |              |           |       | Low dose hCG      | Lupron + 1500 hCG | 250         | 56       | - |
| 30      | PCOS      | 33  | 10.4  | 28            | GnRH Antag        | 900         |             | 525                     |            | 1,000        |              |           |       | Lupron + 3000 hCG | 100               | 15          | -        |   |
| 31      | PCOS      | 32  | 4.56  | 25            | GnRH Antag        | 3,000       |             | 1,350                   |            | 1,250        |              |           |       | Lupron + 3000 hCG | 90                | 28          | Y        |   |
| 32      | PCOS      | 32  | 6.31  | 11+           | GnRH Antag        | 2,775       |             | 1,500                   |            | 1,500        |              |           |       | Lupron + 3300 hCG | 50                | 16          | -        |   |
| 33      | PCOS      | 34  | 6.54  | 21            | Lupron Microflare |             | 2,625       |                         | 2,625      |              | X            | X         |       | 10k hCG           | 100               | 14          | N        |   |
| 34      | PCOS      | 32  | >16   | 40+           | GnRH Antag        | 1,800       |             | 1,500                   |            | 1,250        |              |           |       | Low dose hCG      | Lupron + 4800 hCG | 200         | 82       | N |
| 35      | PCOS      | 34  | 2.27  | 22            | GnRH Antag        | 3,000       |             | 1,800                   |            | 1,000        |              |           |       | 10k hCG           | 120               | 10          | -        |   |
| 36      | PCOS      | 30  | 11.59 | 45            | GnRH Antag        | 2,250       |             | 2,475                   |            | 1,000        |              |           |       | Double Lupron     | 100               | 25          | Y        |   |
| 37      | PCOS      | 33  | 3.72  | 8 (one ovary) | GnRH Antag        | 2,475       |             | 2,475                   |            | 1,250        |              |           |       | 10k hCG           | 75                | 10          | Y        |   |
| 38      | Other     | 36  | 6.78  | 29            | GnRH Antag        |             | 2,475       |                         | 825        | 1,250        |              |           |       | Lupron + 3300 hCG | 185               | 26          | Y        |   |
| 39      | Other     | 37  | 7.96  | 11            | GnRH Antag        | 1,200       |             | 600                     |            | 1,250        |              |           |       | Lupron + 3300 hCG | 85                | 17          | -        |   |
| 40      | Other     | 39  | 4.04  | 26            | GnRH Antag        |             | 3,000       |                         | 1,800      | 1,250        |              | X         |       | 10k hCG           |                   | 11          | N        |   |
| 41      | Other     | 26  | 1.06  | 13            | GnRH Antag        | 2,850       |             | 1,350                   |            | 1,000        |              |           |       | 10k hCG           | 40                | 6           | -        |   |

Supplemental Table 4. Progesterone concentrations in conditioned media after 48 hr culture with vehicle, rh-FSH or TOP5300.

| Trigger              | Compound concentration (nM) | Mean Progesterone [ng/mL] (+/- SEM) |
|----------------------|-----------------------------|-------------------------------------|
| 10,000 IU hCG        | FSH-100                     | 2.49 (0.75)                         |
|                      | FSH-20                      | 1.59 (0.44)                         |
|                      | FSH-4                       | 1.76 (0.44)                         |
|                      | FSH-0.8                     | 1.57 (0.40)                         |
| 10,000 IU hCG        | TOP-400                     | 4.72 (1.58)                         |
|                      | TOP-80                      | 4.62 (1.5)                          |
|                      | TOP-16                      | 2.30 (0.62)                         |
|                      | TOP-3.2                     | 1.72 (0.39)                         |
| Lupron + 3300 IU hCG | FSH or TOP-100              | >40.0 (UL)                          |
|                      | FSH or TOP-20               | >40.0 (UL)                          |
|                      | FSH or TOP-4                | >40.0 (UL)                          |
|                      | FSH or TOP-0.8              | >40.0 (UL)                          |

UL: Progesterone concentrations were beyond the upper limit of detection in these samples, and insufficient sample was left to repeat assay.

Note: for only progesterone determinations, samples were exposed to high ambient temperatures during shipment due to logistical errors of shippers during COVID-19 pandemic.
